# Supplementary material
Source: Springer Nature journal article supplement (https://www.springermedizin.de/resource/supplementary/12889_2011_3776_MOESM4_ESM.pdf/9491292)

# Aborigine

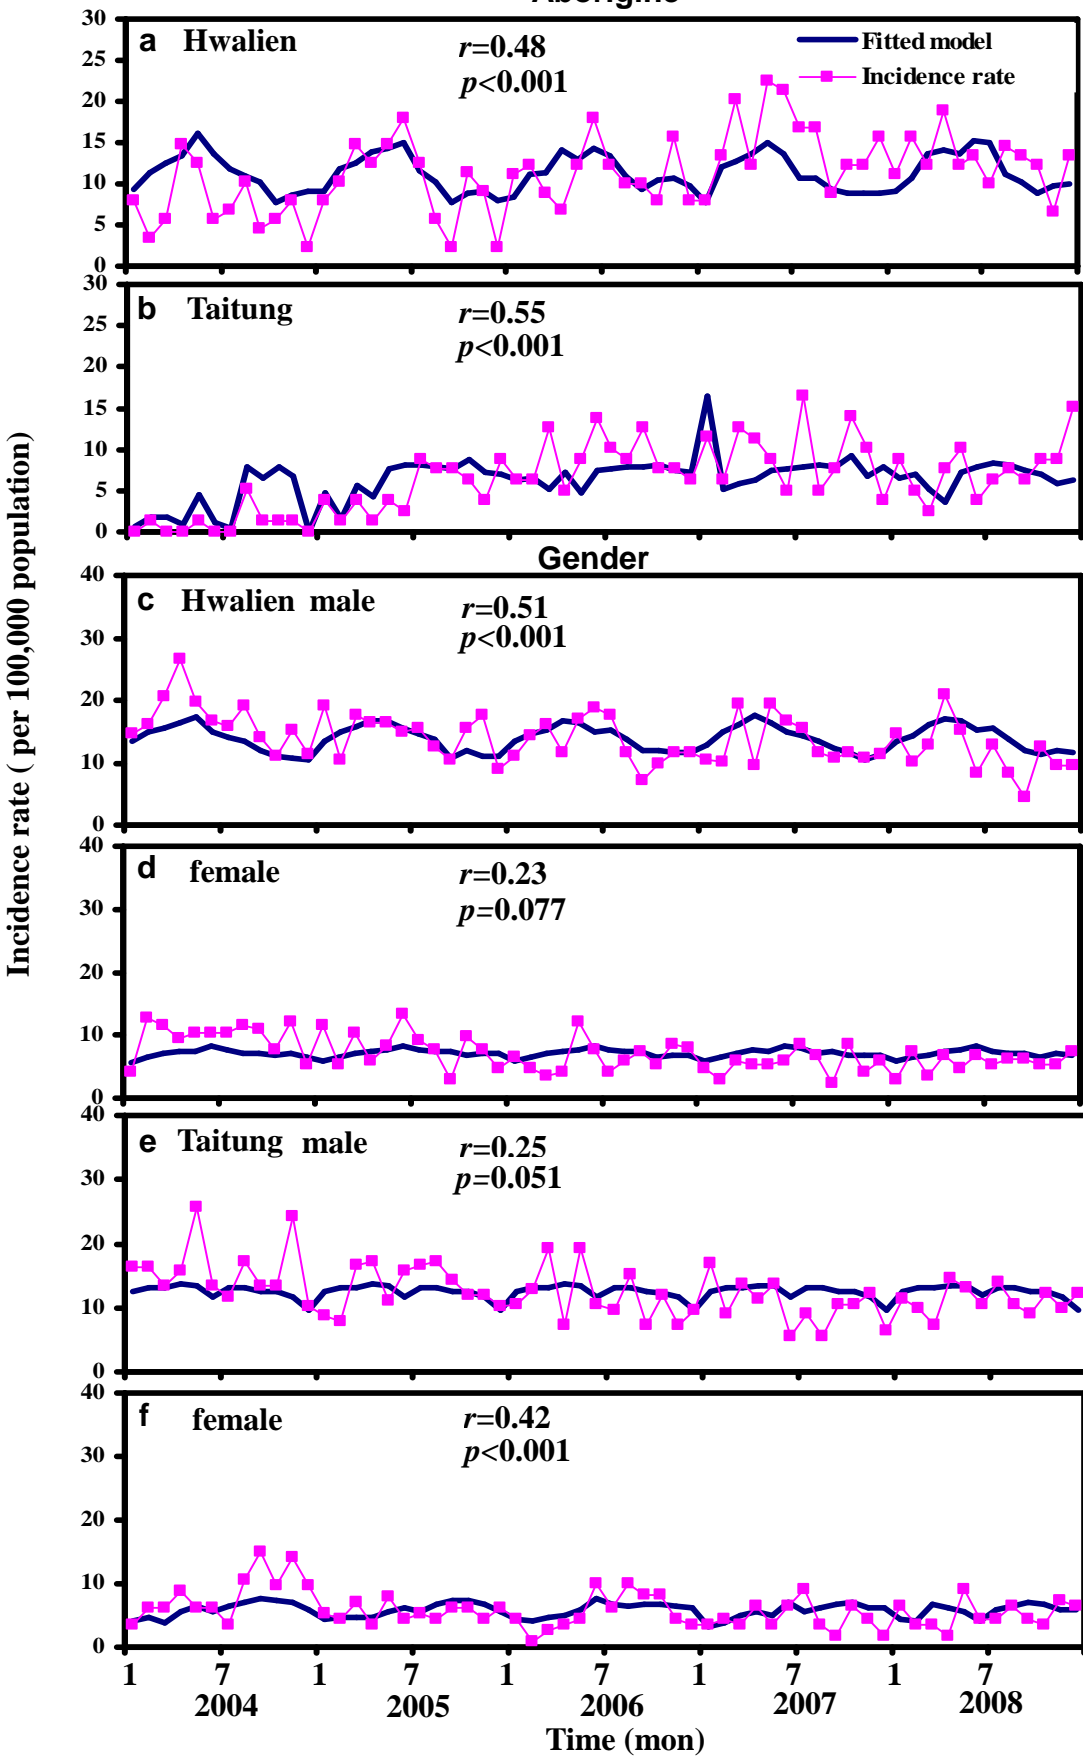

Supplement: MOESM4 [file 9491292]
